# Supplementary material for: A New Anorganic Equine Bone Substitute for Oral Surgery: Structural Characterization and Regenerative Potential
Source: MDPI journal article supplement (doi:10.3390/ma15031031), 2022-01-28
Supplement: s1 [file s1]

# A New Anorganic Equine Bone Substitute for Oral Surgery: Structural Characterization and Regenerative Potential

Alessandro Addis <sup>1</sup>, Elena Canciani <sup>2</sup>, Marino Campagnol <sup>1</sup>, Matteo Colombo <sup>3</sup>, Christian Frigerio <sup>3</sup>, Daniele Recupero <sup>3</sup>, Claudia Dellavia <sup>2</sup> and Marco Morroni <sup>3,\*</sup>

<sup>1</sup> CRABCC Animal Lab, Biotechnology Research Center for Cardiothoracic Applications, Rivolta d'Adda, 26027 Cremona, Italy; alessandro.addis@crabcc.com (A.A.); marino.campagnol@unimi.it (M.C.)

<sup>2</sup> Department of Biomedical Surgical and Dental Sciences, Università Degli Studi di Milano, 20122 Milan, Italy; elena.canciani@unimi.it (E.C.); claudia.dellavia@unimi.it (C.D.)

<sup>3</sup> Bioteck S.p.A., Arcugnano, 36057 Vicenza, Italy; m.colombo@bioteck.com (M.C.); c.frigerio@bioteck.biz (C.F.); d.recupero@bioteck.biz (D.R.)

\* Correspondence: m.morroni@bioteck.com

include country code; if there are multiple corresponding authors, add author initials)

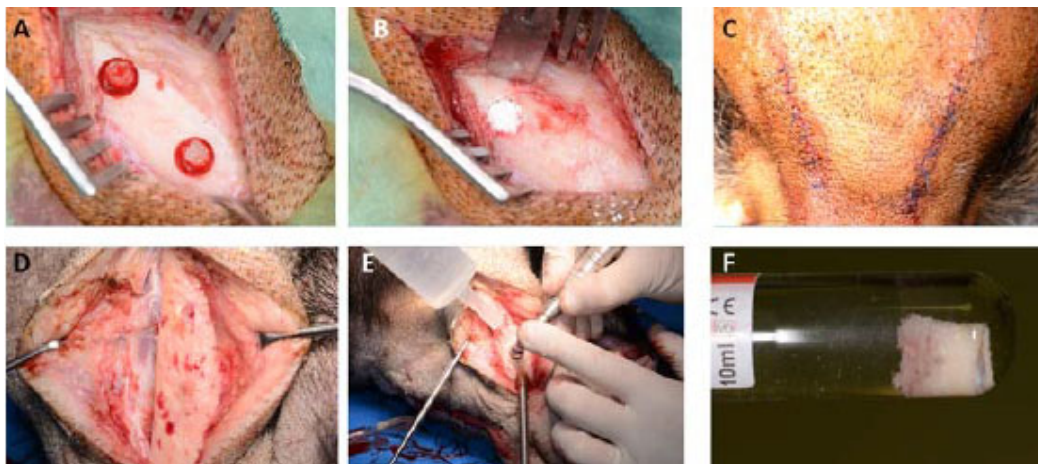

**Figure S1.** Example of surgical pictures taken during the surgery: performing of surgical defects (A), grafting with the devices under investigation and protection of the grafting with pericardium membrane (B), suturing (C), opening of the surgical sites after specific time points (D), collection of bone samples (E), and storing of bone cores in 10% formalin (F).
